# Supplementary material for: The Impact of Hypertension Definition Based on Two-visit Strategy on Estimate of Hypertension Burden: Results From the China Health and Nutrition Survey 1989–2011
Source: PubMed Central journal article supplement (PMC7878710; doi:10.2188/jea.je20190163), 2021-03-05
Supplement: je-31-180-s001.pdf [file je-31-180-s001.pdf]

**eTable 1.** Baseline characteristics of the participants who were free of hypertension: CHNS 1989–2006

| Characteristics                       | CHNS 1989-2009                |                  |                  |                  |                  |                  |                  | Total            |
|---------------------------------------|-------------------------------|------------------|------------------|------------------|------------------|------------------|------------------|------------------|
|                                       | 1989                          | 1991             | 1993             | 1997             | 2000             | 2004             | 2006             |                  |
| All participants (n)                  | 4764                          | 3541             | 618              | 2180             | 1260             | 1136             | 558              | 14057            |
| Age (years) <sup>a</sup>              | 31.7 (12.2)                   | 48.0 (34.3)      | 26.6 (25.7)      | 33.7 (18.6)      | 33.8 (19.0)      | 37.9 (20.6)      | 35.5 (20.0)      | 34.0 (19.8)      |
| BMI (kg/m <sup>2</sup> ) <sup>a</sup> | 21.2 (3.0)                    | 20.9 (3.5)       | 20.8 (2.9)       | 21.7 (3.7)       | 22.1 (3.9)       | 22.4 (4.1)       | 22.3 (4.5)       | 21.3 (3.5)       |
| SBP (mmHg) <sup>a</sup>               | 110.0 (20.0)                  | 110.0 (18.0)     | 110.0 (18.7)     | 113.3 (13.3)     | 113.3 (13.3)     | 115.3 (12.7)     | 114.8 (13.4)     | 110.0 (16.7)     |
| DBP (mmHg) <sup>a</sup>               | 70.0 (12.0)                   | 71.3 (12.7)      | 71.7 (12.7)      | 75.0 (10.0)      | 75.0 (10.0)      | 76.0 (10.0)      | 76.0 (10.0)      | 72.0 (12.0)      |
| Ever smoking(%) <sup>b</sup>          | 26.3 (25.1-27.6) <sup>c</sup> | 33.7 (32.2-35.3) | 32.2 (28.5-35.9) | 29.8 (27.9-31.7) | 25.2 (22.8-27.6) | 24.9 (22.4-27.4) | 21.9 (18.4-25.3) | 28.6 (27.9-29.3) |
| Ever drinking(%) <sup>b</sup>         | 30.7 (29.4-32.0) <sup>c</sup> | 35.6 (34.0-37.2) | 35.6 (31.8-39.4) | 35.3 (33.3-37.3) | 30.4 (27.9-32.9) | 29.0 (26.4-31.7) | 26.0 (22.3-29.6) | 32.5 (31.7-33.3) |
| Urban resident(%) <sup>b</sup>        | 31.5 (30.2-32.8)              | 31.3 (29.8-32.9) | 26.2 (22.7-29.7) | 47.6 (45.5-49.7) | 37.1 (34.4-39.7) | 46.4 (43.5-49.3) | 40.5 (36.4-44.6) | 35.8 (35.0-36.6) |
| Male (n)                              | 2220                          | 1690             | 303              | 1005             | 505              | 464              | 208              | 6395             |
| Age (years) <sup>a</sup>              | 31.8 (12.6)                   | 47.0 (34.1)      | 29.0 (25.4)      | 34.1 (18.5)      | 36.7 (18.6)      | 40.1 (19.2)      | 38.7 (20.7)      | 34.8 (20.1)      |
| BMI (kg/m <sup>2</sup> ) <sup>a</sup> | 20.9 (2.8)                    | 20.8 (3.1)       | 20.8 (2.8)       | 21.7 (3.6)       | 22.5 (4.2)       | 22.9 (4.1)       | 23.3 (4.6)       | 21.2 (3.4)       |
| SBP (mmHg) <sup>a</sup>               | 110.0 (15.0)                  | 112.0 (15.0)     | 110.7 (15.0)     | 118.0 (10.7)     | 118.7 (12.0)     | 120.0 (13.1)     | 119.3 (11.8)     | 113.7 (13.3)     |
| DBP (mmHg) <sup>a</sup>               | 70.0 (12.0)                   | 73.3 (10.7)      | 75.0 (10.0)      | 78.0 (10.0)      | 78.3 (10.0)      | 78.7 (10.0)      | 78.8 (8.7)       | 75.0 (10.0)      |
| Ever smoking (%) <sup>b</sup>         | 54.9 (52.8-56.9) <sup>c</sup> | 63.8 (61.6-66.1) | 61.7 (56.2-67.2) | 57.5 (54.5-60.6) | 57.8 (53.5-62.1) | 57.3 (52.8-61.8) | 53.4 (46.6-60.1) | 58.3 (57.1-59.6) |
| Ever drinking (%) <sup>b</sup>        | 53.7 (51.6-55.8) <sup>c</sup> | 60.5 (58.1-62.8) | 62.0 (56.6-67.5) | 62.6 (59.6-65.6) | 61.4 (57.1-65.6) | 58.2 (53.7-62.7) | 57.7 (51.0-64.4) | 58.3 (57.1-59.6) |
| Urban resident(%) <sup>b</sup>        | 30.7 (28.8-32.6)              | 30.5 (28.3-32.7) | 27.1 (22.1-32.1) | 47.7 (44.6-50.7) | 39.6 (35.3-43.9) | 49.4 (44.8-53.9) | 47.6 (40.8-54.4) | 35.8 (34.6-36.9) |
| Female (n)                            | 2544                          | 1851             | 315              | 1175             | 755              | 672              | 350              | 7662             |
| Age (years) <sup>a</sup>              | 31.6 (11.9)                   | 48.4 (34.4)      | 25.2 (27.1)      | 33.1 (18.7)      | 31.8 (18.5)      | 35.7 (20.0)      | 33.6 (17.9)      | 33.4 (19.4)      |
| BMI (kg/m <sup>2</sup> ) <sup>a</sup> | 21.4 (3.2)                    | 21.0 (4.0)       | 20.8 (3.3)       | 21.7 (3.9)       | 21.9 (3.8)       | 22.0 (4.0)       | 21.8 (4.3)       | 21.5 (3.7)       |
| SBP (mmHg) <sup>a</sup>               | 109.0 (15.0)                  | 110.0 (20.0)     | 108.0 (18.0)     | 110.0 (16.7)     | 110.0 (16.7)     | 110.7 (17.2)     | 110.7 (18.0)     | 110.0 (20.0)     |
| DBP (mmHg) <sup>a</sup>               | 70.0 (12.0)                   | 70.0 (13.7)      | 70.0 (12.7)      | 72.0 (10.7)      | 72.7 (11.3)      | 73.3 (11.3)      | 73.7 (12.0)      | 70.0 (13.3)      |
| Ever smoking(%) <sup>b</sup>          | 1.5 (1.0-1.9) <sup>c</sup>    | 6.2 (5.1-7.3)    | 3.8 (1.7-5.9)    | 6.1 (4.8-7.5)    | 3.3 (2.0-4.6)    | 2.5 (1.3-3.7)    | 3.1 (1.3-5.0)    | 3.8 (3.4-4.2)    |
| Ever drinking(%) <sup>b</sup>         | 10.7 (9.5-11.9) <sup>c</sup>  | 12.9 (11.3-14.4) | 10.2 (6.8-13.5)  | 11.9 (10.1-13.8) | 9.7 (7.6-11.8)   | 8.9 (6.8-11.1)   | 7.1 (4.4-9.8)    | 11.0 (10.3-11.7) |
| Urban resident(%) <sup>b</sup>        | 32.2 (30.4-34.0)              | 32.1 (30.0-34.2) | 25.4 (20.6-30.2) | 47.5 (44.6-50.3) | 35.4 (32.0-38.8) | 44.3 (40.6-48.1) | 36.3 (31.2-41.3) | 35.8 (34.7-36.9) |

SBP, systolic blood pressure; DBP, diastolic blood pressure; BMI, body mass index.

<sup>a</sup> Median with Inter Quartile Range (IQR).

<sup>b</sup> Percentage with 95% confidence interval (95% CI).

<sup>c</sup> Because the percentages of ever smoker and alcohol drinker were not investigated in 1989, so we fill the missing value using the data from the same participants in 1991.

**eTable 2.** Characteristics of the Participants Aged 18 Years and Older: CHNS 2006

| Characteristics                       | Male             | Female           |
|---------------------------------------|------------------|------------------|
| All participants (n)                  | 4304             | 4823             |
| Age (years) <sup>a</sup>              | 49.4 (21.6)      | 49.6 (21.4)      |
| BMI (kg/m <sup>2</sup> ) <sup>a</sup> | 22.8 (4.4)       | 22.8 (4.5)       |
| SBP (mmHg) <sup>a</sup>               | 120.0 (19.4)     | 119.3 (21.3)     |
| DBP (mmHg) <sup>a</sup>               | 80.0 (12.7)      | 78.0 (12.0)      |
| Ever smoking (%) <sup>b</sup>         | 62.0 (60.6-63.5) | 4.0 (3.4-4.6)    |
| Ever drinking (%) <sup>b</sup>        | 58.4 (56.9-59.9) | 8.2 (7.4-9.0)    |
| Urban resident (%) <sup>b</sup>       | 34.2 (32.8-35.6) | 34.2 (32.8-35.5) |

BMI, body mass index; DBP, diastolic blood pressure; SBP, systolic blood pressure.

<sup>a</sup> Median with Inter Quartile Range (IQR).

<sup>b</sup> Percentage with 95% confidence interval (95% CI).

**eTable 3.** Sensitivity Analysis of the hypertension prevalence<sup>a</sup> based on two-visit strategy in 2006

| Characteristics               | Subtypes        |                 |                  |                    | HTN                |
|-------------------------------|-----------------|-----------------|------------------|--------------------|--------------------|
|                               | ISH             | IDH             | SDH              | Med                |                    |
| N                             | 283             | 328             | 374              | 642                | 1627               |
| All participants              | 2.25(1.94-2.55) | 3.17(2.81-3.53) | 3.08(2.73-3.44)  | 5.00(4.55-5.45)    | 13.50(12.80-14.20) |
| <b>Gender</b>                 |                 |                 |                  |                    |                    |
| Male                          | 2.21(1.77-2.65) | 4.26(3.66-4.87) | 3.82(3.25-4.40)  | 4.68(4.05-5.31)    | 14.98(13.91-16.04) |
| Female                        | 2.28(1.86-2.70) | 2.18(1.77-2.60) | 2.43(1.99-2.86)  | 5.32(4.69-5.95)    | 12.21(11.28-13.13) |
| <b>Age (years)</b>            |                 |                 |                  |                    |                    |
| 18-39                         | 0.31(0.10-0.53) | 2.00(1.46-2.54) | 0.82(0.47-1.17)  | 0.31(0.10-0.53)    | 3.44(2.74-4.15)    |
| 40-59                         | 1.95(1.54-2.37) | 4.25(3.64-4.85) | 4.17(3.57-4.77)  | 5.39(4.17-6.07)    | 15.76(14.67-16.85) |
| ≥60                           | 8.18(7.06-9.30) | 4.00(3.20-4.80) | 6.86(5.82-7.90)  | 16.99(15.45-18.53) | 36.03(34.06-38.00) |
| <b>BMI (kg/m<sup>2</sup>)</b> |                 |                 |                  |                    |                    |
| <18.5                         | 1.16(0.28-2.05) | 1.29(0.36-2.23) | 2.59(1.28-3.90)  | 1.78(0.68-2.87)    | 6.83(4.74-8.91)    |
| 18.5-23.9                     | 1.93(1.56-2.31) | 2.59(2.15-3.02) | 2.14(1.74-2.53)  | 3.14(2.66-3.61)    | 9.79(8.98-10.60)   |
| 24.0-27.9                     | 2.22(1.65-2.79) | 4.27(3.49-5.05) | 3.36(2.66-4.05)  | 6.65(5.69-7.60)    | 16.49(15.06-17.92) |
| ≥28.0                         | 4.54(3.09-6.00) | 5.55(3.95-7.14) | 8.10(6.20-10.00) | 11.31(9.10-13.52)  | 29.51(26.33-32.69) |
| <b>Smoking status</b>         |                 |                 |                  |                    |                    |
| Never smoking                 | 2.36(1.98-2.73) | 2.81(2.40-3.22) | 2.74(2.40-3.14)  | 5.29(4.74-5.84)    | 13.19(12.35-14.03) |
| Ever smoking                  | 2.09(1.57-2.62) | 3.96(3.24-4.67) | 3.76(3.06-4.46)  | 4.46(3.71-5.22)    | 14.27(12.99-15.55) |
| <b>Drinking status</b>        |                 |                 |                  |                    |                    |
| Never drinking                | 2.12(1.76-2.47) | 2.57(2.17-2.96) | 2.49(2.10-2.88)  | 5.32(4.76-5.88)    | 12.49(11.67-13.31) |
| Ever drinking                 | 2.57(1.99-3.14) | 4.39(3.64-5.13) | 4.26(3.53-4.99)  | 4.13(3.41-4.85)    | 15.34(14.03-16.65) |
| <b>Region</b>                 |                 |                 |                  |                    |                    |
| Urban resident                | 1.93(1.44-2.41) | 3.04(2.44-3.65) | 2.80(2.22-3.38)  | 6.65(5.78-7.53)    | 14.42(13.19-15.66) |
| Rural resident                | 2.43(2.04-2.82) | 3.24(2.79-3.69) | 3.28(2.83-3.73)  | 4.05(3.55-4.55)    | 13.00(12.15-13.85) |

BMI, body mass index, kg/m<sup>2</sup>; CI, confidence interval; HTN, hypertension, total of the four subtypes; IDH, isolated diastolic hypertension; ISH, isolated systolic hypertension; Med, current use of antihypertensive medication; SDH, systolic-diastolic hypertension.

<sup>a</sup> the prevalence based on two-visit strategy = (the population of hypertension based on two- visit strategy + the lost population based on two-visit strategy)/all the population in 2006

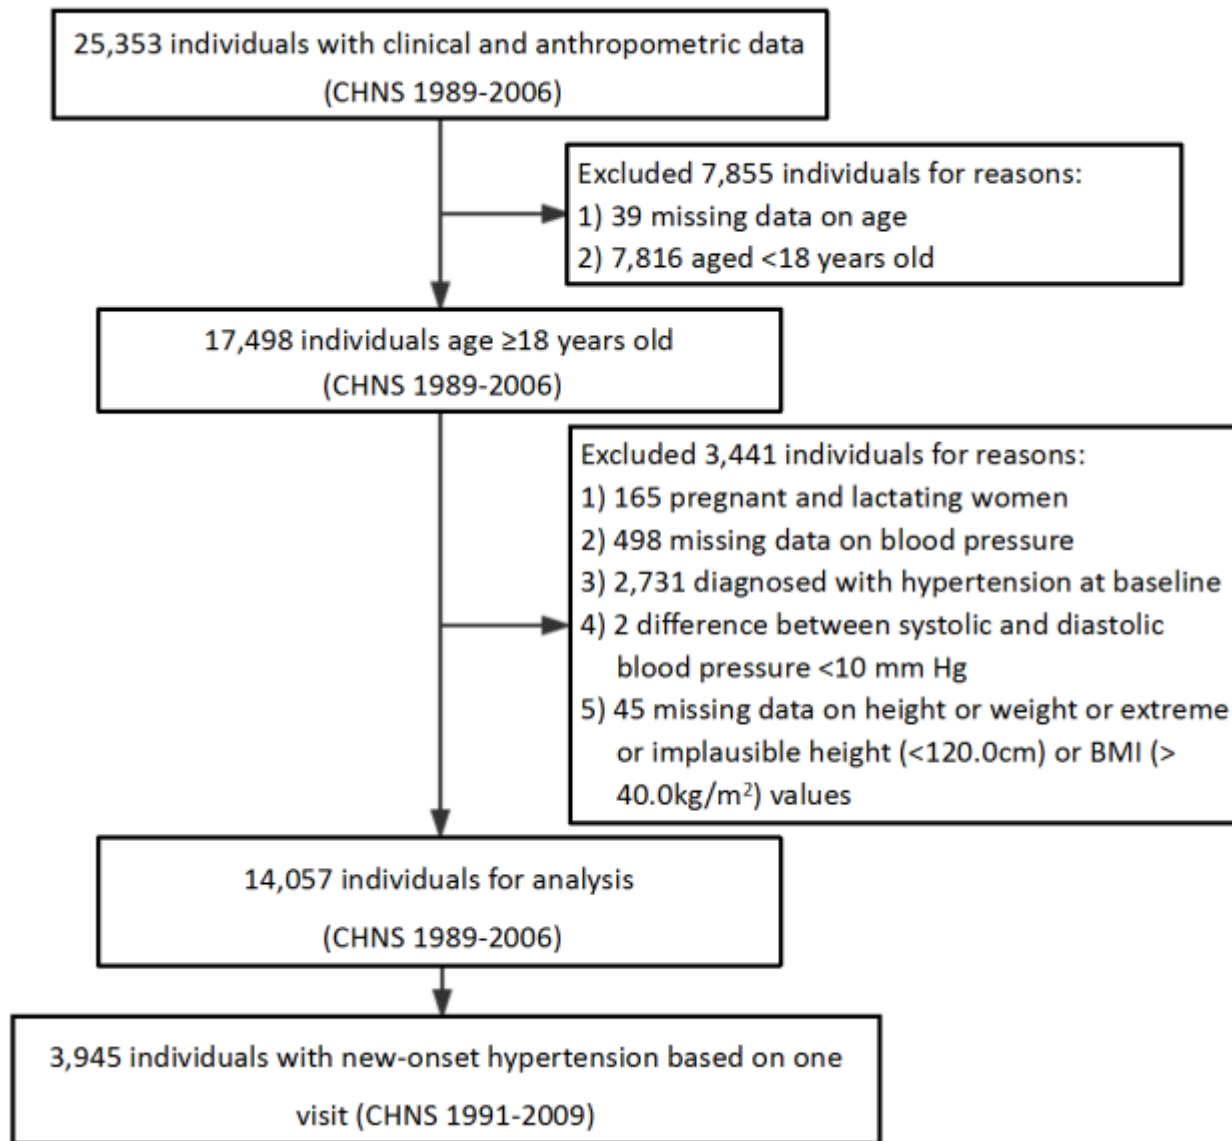

**eFigure 1.** Flow chart illustrating the sample selection for the cohort study

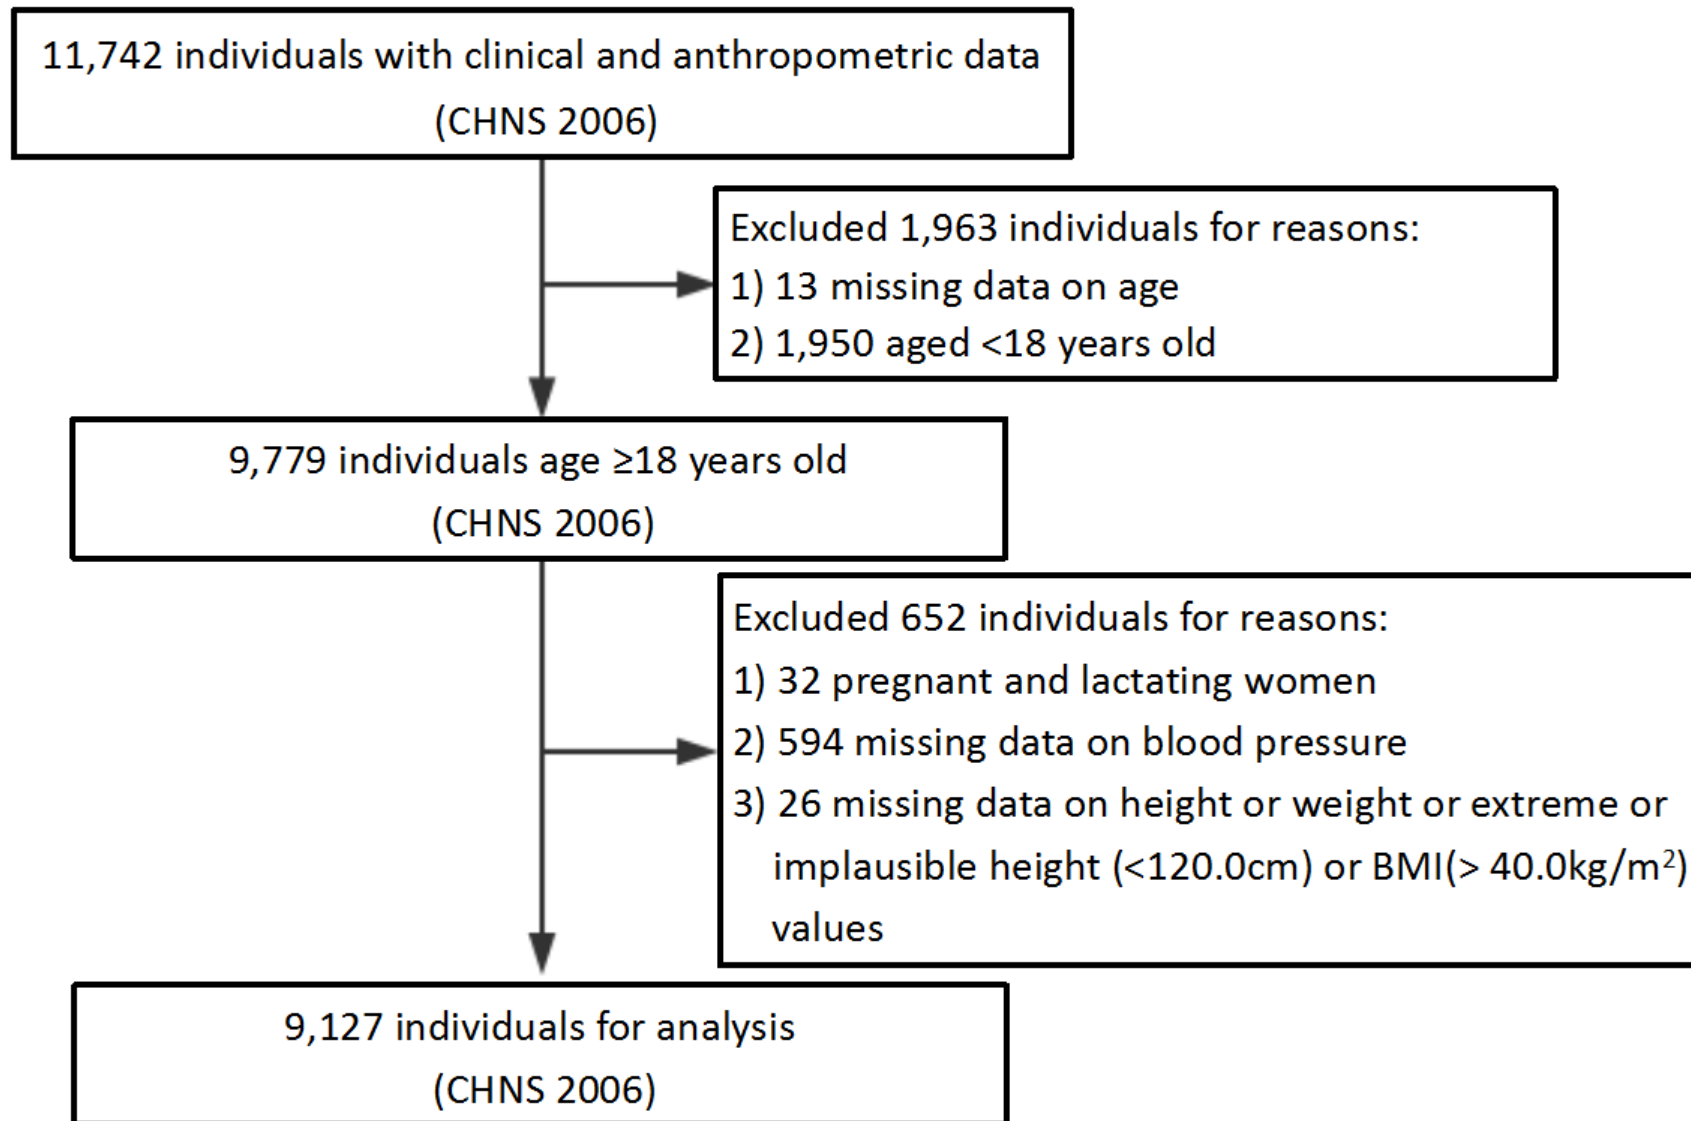

**eFigure 2.** Flow chart illustrating the sample selection for the cross-sectional study
